# Supplementary material for: Just kidding? Exploring the role of traditional versus counter-traditional gender role jokes on gender identity threat
Source: publisher site journal article supplement (doi:10.1515/humor-2025-0042), 2025-08-26

**Supplemental Materials**

**Unanalyzed Measures**

The measurements below were measured but not included in any analysis.

**Perceived sarcasm, offensiveness and funniness.** The participants were asked to rate sarcasm (*M* = 3.67, *SD* = 1.53), offensiveness (*M* = 2.99, *SD* =1.52), and funniness of the jokes (*M* = 3.61, *SD* = 1.47) on a scale of 1 (Strongly disagree) to 7 (Strongly agree).

**Attitudes towards traditional gender role** (Bakioğlu & Türküm, 2018; García-Cueto et al., 2014). A Turkish-adapted version of the 15-item Traditional Gender Role Scale was used to measure participants’ attitudes toward traditional gender roles (e.g., ‘I think it is worse to see a man cry than a woman.’ Response options ranged from 1 = Strongly Disagree to 5 = Strongly Agree). The mean score was 2.45, (*SD* = 1.11) in the current study.

**Mood.** Participants’ momentary mood was assessed using two items. They rated the extent to which they felt happy (vs. unhappy) and good (vs. bad) at the time of assessment, using a 7-point scale ranging from 1 (Extremely unhappy/bad) to 7 (Extremely happy/good).

**Manipulation check.** Participants were asked to rate the extent to which jokes targeting women and men reflect social perceptions of women and men, respectively, on a 7-point Likert scale (1= Not at all, 7 = Very much). All participants assessed about jokes targeting women after seeing 3 traditional or counter-traditional jokes about women, and related jokes targeting men after 3 traditional or counter-traditional jokes about men.

**Experimental Stimuli**

**Image 1. Men-targeted non-traditional joke 1**


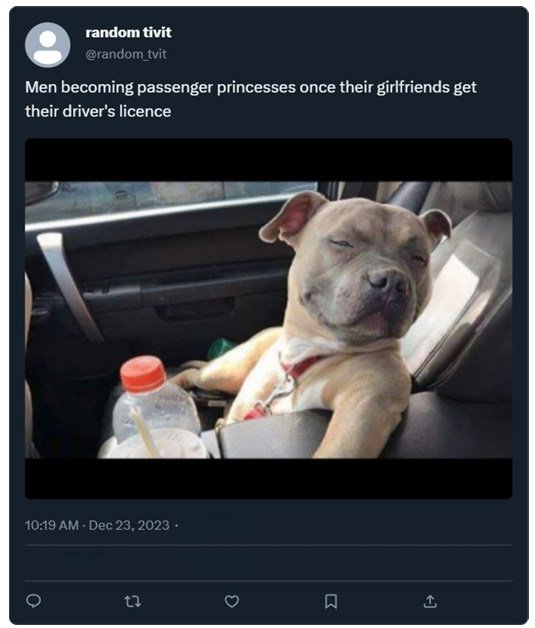


**Image 2. Men-targeted non-traditional joke 2**
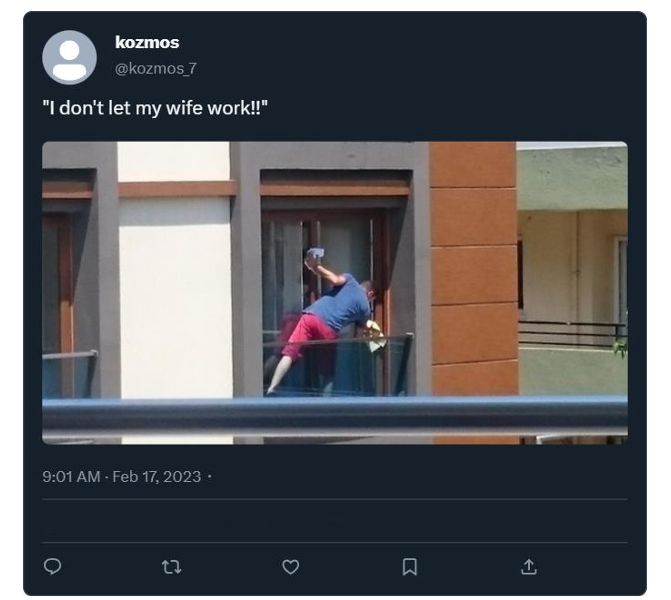


**Image 3. Men-targeted non-traditional joke 3**
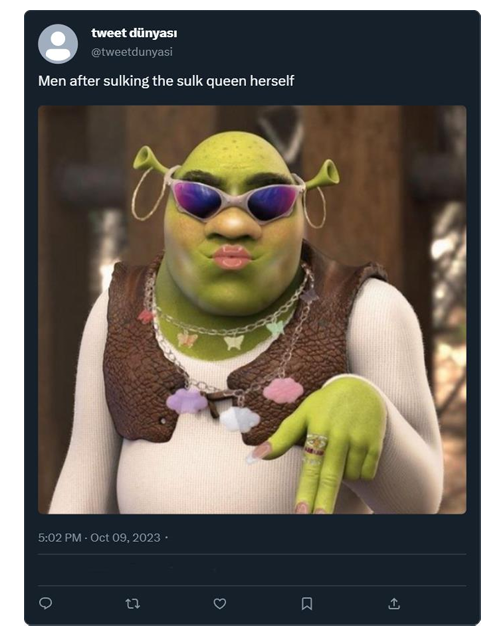


**Image 4. Men-targeted traditional joke 1**


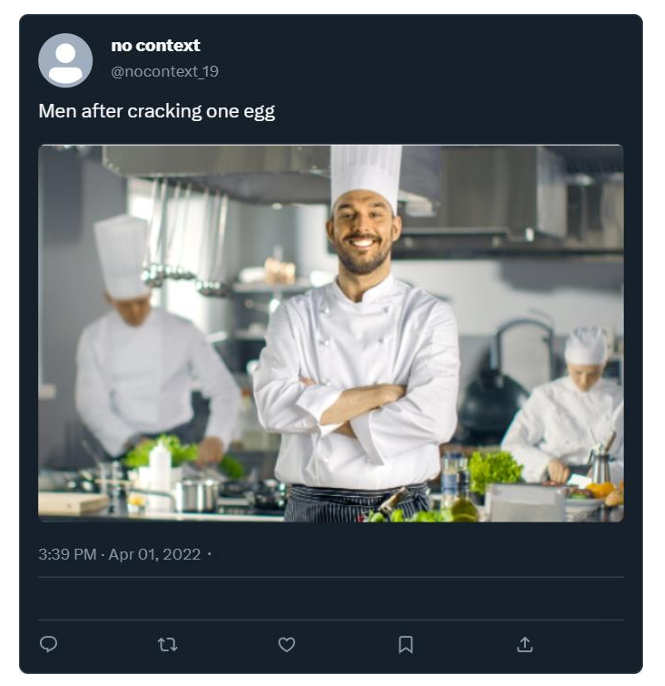


**Image 5. Men-targeted traditional joke 2**


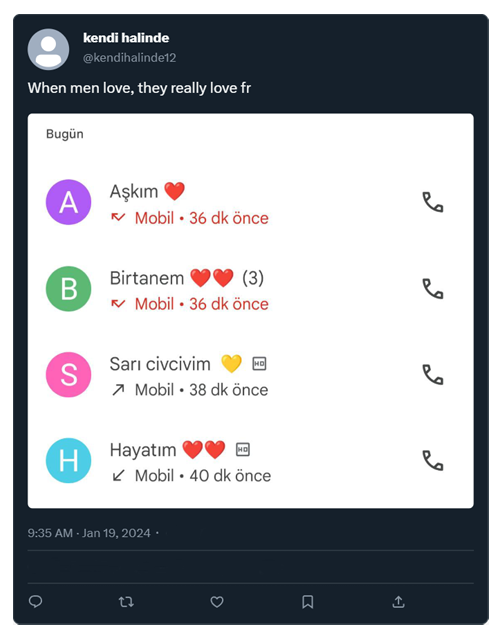


**Image 6. Men-targeted traditional joke 3**


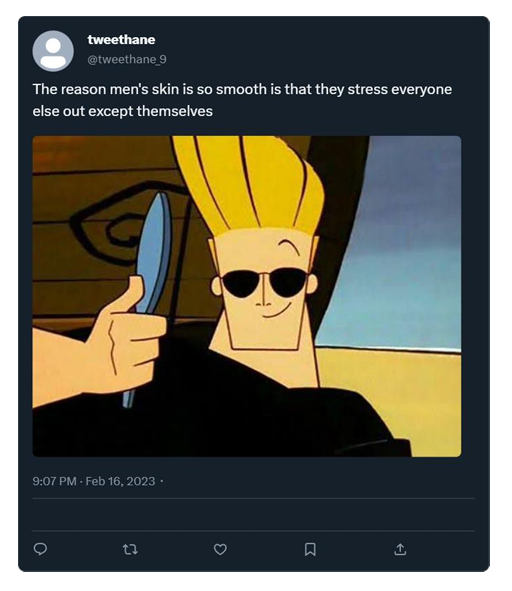


**Image 7. Women-targeted traditional joke 1**


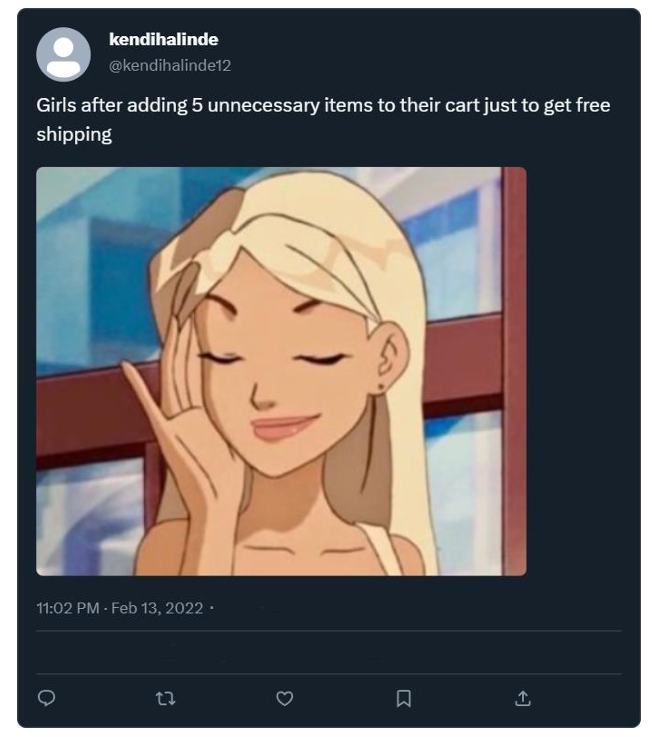


**Image 8. Women-targeted traditional joke 2**


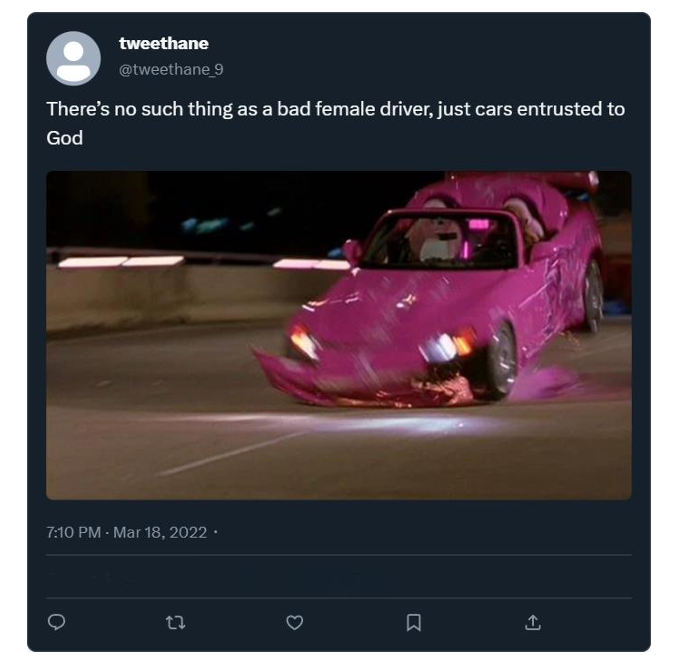


**Image 9. Women-targeted traditional joke 3**


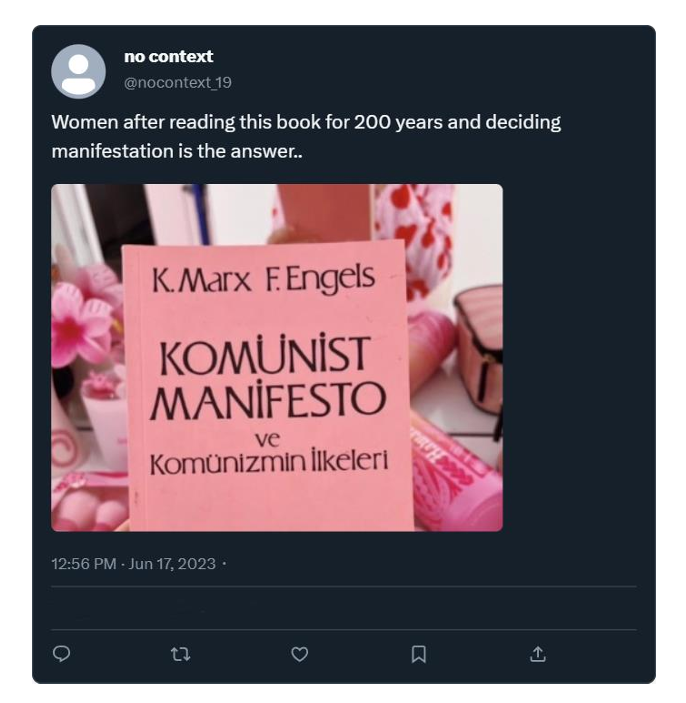


**Image 10. Women-targeted non-traditional joke 1**


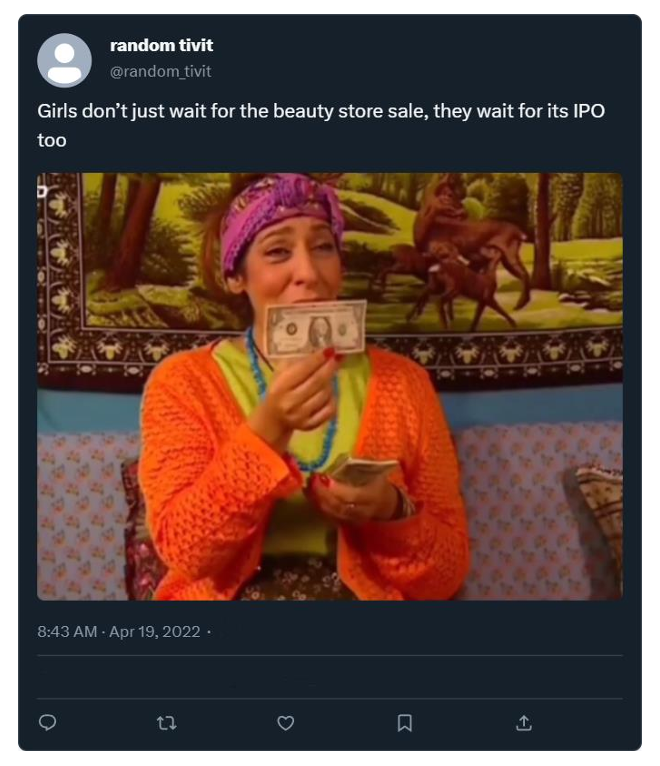


**Image 11. Women-targeted non-traditional joke 2**


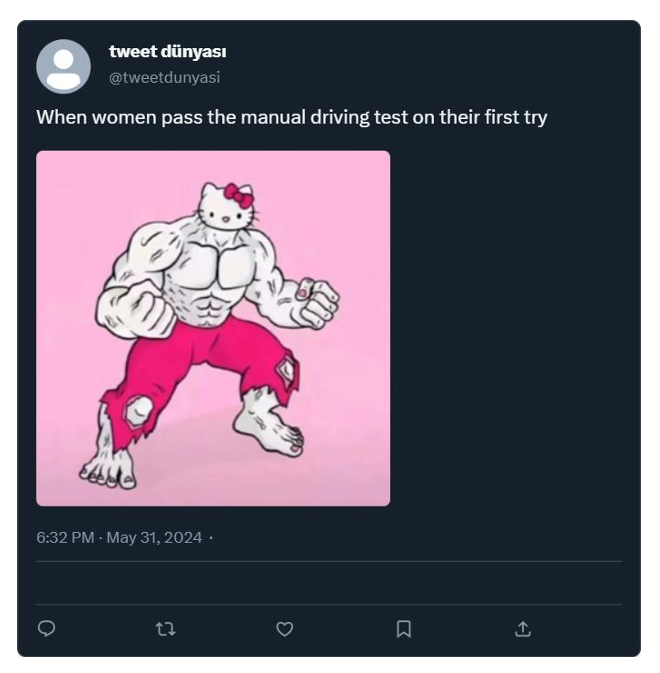


**Image 12. Women-targeted non-traditional joke 3**
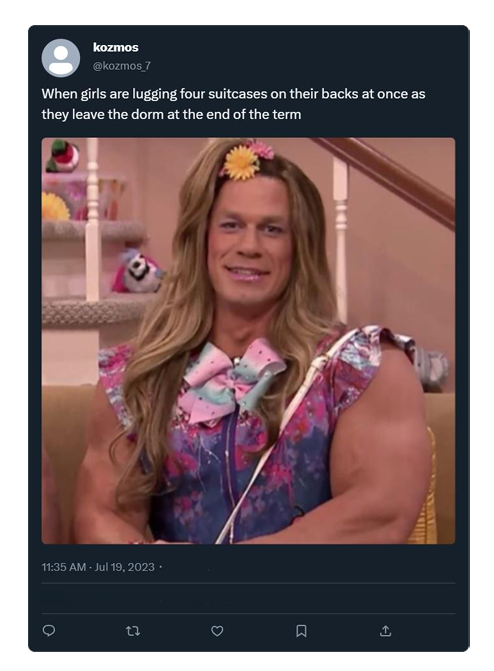

Supplement: Supplementary file 1 [file j_humor-2025-0042_suppl_001.docx]
